# Supplementary material
Source: Springer Nature journal article supplement (https://www.springermedizin.de/resource/supplementary/12936_2014_3588_MOESM8_ESM.pdf/9545980)

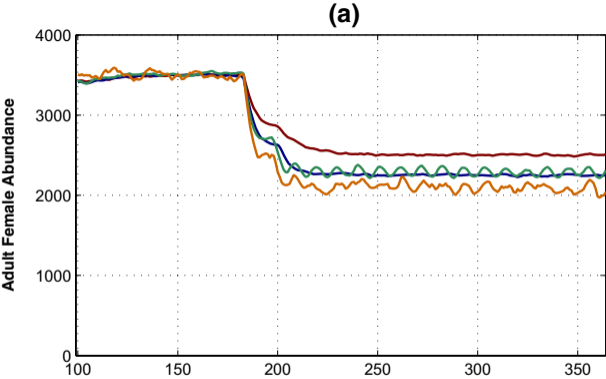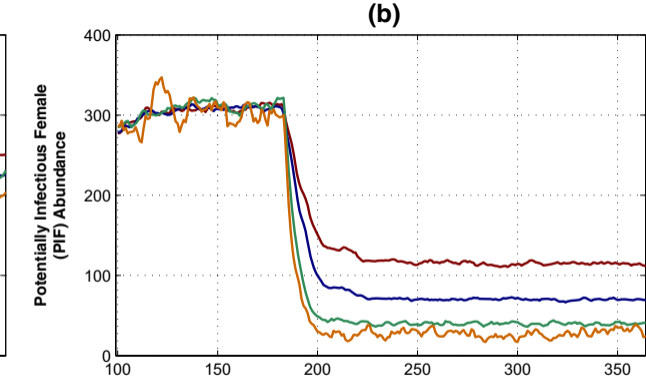

—  $BMD_{Resting} C = 50\%$  —  $BMD_{Resting} C = 75\%$  —  $G_{Foraging} C = 25\%$  —  $BMD_{Resting} G_{Foraging} C = 25\%$

Supplement: MOESM8 [file 9545980]
